# Supplementary material for: The anthropometric assessment of body composition and nutritional status in children aged 2–15 years: A cross-sectional study from three districts in Bangladesh
Source: PubMed Central journal article supplement (PMC8428712; doi:10.1371/journal.pone.0257055), 2021-09-09
Supplement: pone.0257055.s001.pdf [file pone.0257055.s001.pdf]

## Survey Questionnaire

Dept. of Applied Nutrition and Food Technology  
Islamic University, Kushtia-7003, Bangladesh

Date:

### **Demographic Details**

1. Name of the Respondent:
2. Gender:
3. Father's Name:
4. Father's Occupation:
5. Father's Highest Education:
6. Mother's Name:
7. Mother's Occupation:
8. Mother's Education:
9. Address:
  
10. Best Daytime cellphone No (if applicable):
11. Total Family Income (BDT):
12. Source of Drinking Water:
13. Respondent's Education:
14. Respondent's Occupation:
15. Hand Washing Practice (Before meal and after toilet):

### **Anthropometric Details**

16. Details of Respondent:

Table A

| Date of Birth   | Age (Y & M) | Height (cm) | Weight (kg) | MUAC (mm) |
|-----------------|-------------|-------------|-------------|-----------|
| 1 <sup>st</sup> |             |             |             |           |
| 2 <sup>nd</sup> |             |             |             |           |
| 3 <sup>rd</sup> |             |             |             |           |
| Average         |             |             |             |           |

Table B

|                 | Skinfold Thickness (mm) |       |             |             |           |       |      |
|-----------------|-------------------------|-------|-------------|-------------|-----------|-------|------|
|                 | Tricef                  | Bicef | Subscapular | Suprailliac | Abdominal | Thigh | Calf |
| 1 <sup>st</sup> |                         |       |             |             |           |       |      |
| 2 <sup>nd</sup> |                         |       |             |             |           |       |      |
| 3 <sup>rd</sup> |                         |       |             |             |           |       |      |
| Average         |                         |       |             |             |           |       |      |

\_\_\_\_\_  
Name of Interviewer

\_\_\_\_\_  
Sign of Interviewer

**জরিপ প্রশ্নাবলী**  
ফলিত পুষ্টি ও খাদ্য প্রযুক্তি বিভাগ  
ইসলামিক বিশ্ববিদ্যালয়, কুষ্টিয়া-7003, বাংলাদেশ

তারিখ:

**জনসংখ্যার বিবরণ**

- ১। উত্তরদাতার নাম:
- ২। লিঙ্গ:
- ৩। পিতার নাম:
- ৪। বাবার পেশা:
- ৫। পিতার সর্বোচ্চ শিক্ষা:
- ৬। মাতার নাম:
- ৭। মায়ের পেশা:
- ৮। মায়ের শিক্ষা:
- ৯। ঠিকানা:
- ১০। বেস্ট ডেটাইম সেলফোন নং (প্রয়োজ্য ক্ষেত্রে):
- ১১। পরিবারের মোট আয় (বিডিটি):
- ১২। পানীয় জলের উত্স:
- ১৩। উত্তরদাতাদের শিক্ষা:
- ১৪। উত্তরদাতাদের পেশা:
- ১৫। হাত ধোয়ার অনুশীলন (খাবারের আগে এবং টয়লেট দেওয়ার পরে):

**নৃতাত্ত্বিক বিশদ**

১৬। বিবরণ: টেবিল এ

|     | জন্ম তারিখ | বয়স<br>(বছর ও মাস) | উচ্চতা (সে.মি.) | ওজন (কেজি) | বাহুড় ব্যাস (মিমি) |
|-----|------------|---------------------|-----------------|------------|---------------------|
| ১ম  |            |                     |                 |            |                     |
| ২য় |            |                     |                 |            |                     |
| ৩য় |            |                     |                 |            |                     |
| গড় |            |                     |                 |            |                     |

টেবিল বি

|     | স্কিনফোল্ড থিকনেস (মিমি) |        |                |               |       |     |      |
|-----|--------------------------|--------|----------------|---------------|-------|-----|------|
|     | ট্রাইসেফ                 | বাইসেফ | সাবস্ক্যাপুলার | সুপ্রেইলিয়াক | পেটের | উরু | কালফ |
| ১ম  |                          |        |                |               |       |     |      |
| ২য় |                          |        |                |               |       |     |      |
| ৩য় |                          |        |                |               |       |     |      |
| গড় |                          |        |                |               |       |     |      |

তথ্য গ্রহণকারীর নাম

তথ্য গ্রহণকারীর স্বাক্ষর
